# Supplementary material
Source: MDPI journal article supplement (https://www.mdpi.com/2306-5338/10/11/211)
Supplement: s1 [file s1]

## Supplementary Materials

Table S1: Isotopic dataset

| #  | HSU   | X*<br>(m) | Y*<br>(m) | Depth<br>(m) | Elevation<br>(m) | Degree of confinement | Water type | TDS<br>(mg/L) | Na/Ca<br>(meq/L) | $\delta^{18}\text{O}$<br>(‰ vs VSMOW) | $\delta^2\text{H}$<br>(‰ vs VSMOW) | Tritium<br>(TU) | $^{14}\text{C}$<br>(pmC) | $^{14}\text{C}$ age (years) | $\delta^{13}\text{C}$<br>(‰ PDB) |
|----|-------|-----------|-----------|--------------|------------------|-----------------------|------------|---------------|------------------|---------------------------------------|------------------------------------|-----------------|--------------------------|-----------------------------|----------------------------------|
| 1  | HS-A  | 593855    | 4868347   | 80           | 216              | None                  | Ca-HCO3    | 412           | 0.1              | -11.2                                 | -77.0                              | -               | 59.88                    | 0                           | -9.47                            |
| 2  | HS-A  | 592864    | 4871853   | 59           | 239              | High                  | Na-Cl      | 745           | 4.7              | -12.8                                 | -89.0                              | -               | -                        | -                           | -                                |
| 3  | HS-A  | 597326    | 4871612   | 30           | 266              | None                  | Ca-HCO3    | 398           | 0.1              | -11.5                                 | -77.9                              | -               | 78.63                    | -                           | -10.76                           |
| 4  | HS-A  | 596498    | 4872347   | 16           | 260              | None                  | Ca-HCO3    | 294           | 0.0              | -10.8                                 | -73.0                              | 19.1            | 62                       | 0                           | -8.86                            |
| 5  | HS-A  | 596498    | 4872347   | 67           | 209              | Low                   | Ca-HCO3    | 479           | 0.1              | -11.1                                 | -75.3                              | 14.1            | 77.05                    | 0                           | -11.09                           |
| 6  | HS-A  | 597757    | 4874254   | 144          | 115              | High                  | Na-Cl      | 690           | 3.5              | -12.8                                 | -86.7                              | 0               | 0                        | >25000                      | 8.04                             |
| 7  | HS-A  | 594257    | 4868410   | 77           | 216              | None                  | Ca-HCO3    | 332           | 0.1              | -                                     | -                                  | -               | -                        | -                           | -                                |
| 8  | HS-A  | 594257    | 4868410   | 77           | 216              | None                  | Ca-HCO3    | 298           | 0.4              | -                                     | -                                  | -               | -                        | -                           | -                                |
| 9  | HS-A  | 594257    | 4868410   | 77           | 216              | None                  | Ca-HCO3    | 287           | 0.5              | -                                     | -                                  | -               | -                        | -                           | -                                |
| 10 | HS-A  | 594257    | 4868410   | 77           | 216              | None                  | Ca-HCO3    | 367           | 0.1              | -                                     | -                                  | -               | -                        | -                           | -                                |
| 11 | HS-A  | 594257    | 4868410   | 77           | 216              | None                  | Ca-HCO3    | 372           | 0.1              | -                                     | -                                  | -               | -                        | -                           | -                                |
| 12 | HS-A  | 594257    | 4868410   | 77           | 216              | None                  | Ca-HCO3    | 293           | 0.1              | -                                     | -                                  | -               | -                        | -                           | -                                |
| 13 | HS-A  | 594257    | 4868410   | 77           | 216              | None                  | Ca-HCO3    | 293           | 0.1              | -                                     | -                                  | -               | -                        | -                           | -                                |
| 14 | HS-A  | 594257    | 4868410   | 77           | 216              | None                  | Ca-HCO3    | 282           | 0.1              | -                                     | -                                  | -               | -                        | -                           | -                                |
| 15 | HS-A  | 594257    | 4868410   | 77           | 216              | None                  | Ca-HCO3    | 312           | 0.1              | -                                     | -                                  | -               | -                        | -                           | -                                |
| 16 | HS-A  | 594257    | 4868410   | 77           | 216              | None                  | Ca-HCO3    | 360           | 0.1              | -                                     | -                                  | -               | -                        | -                           | -                                |
| 17 | HS-B1 | 595482    | 4875402   | 89           | 164              | Medium                | Ca-HCO3    | 396           | 0.7              | -11.3                                 | -77.6                              | -               | 39.91                    | 0                           | -11.89                           |
| 18 | HS-B1 | 591600    | 4878100   | 60           | 208              | High                  | Na-HCO3    | 642           | 3.4              | -12.4                                 | -82.9                              | 0               | -                        | -                           | -                                |
| 19 | HS-B1 | 595100    | 4878100   | 71           | 179              | Low                   | Na-HCO3    | 437           | 1.9              | -11.6                                 | -77.7                              | 0               | -                        | -                           | -                                |
| 20 | HS-B1 | 595461    | 4875000   | 89           | 160              | Medium                | Ca-HCO3    | 403           | 0.5              | -11.4                                 | -77.8                              | -               | -                        | -                           | -12.55                           |
| 21 | HS-B1 | 588699    | 4877794   | 29           | 225              | None                  | Na-HCO3    | 359           | 1.4              | -11.1                                 | -75.1                              | -               | -                        | -                           | -13.42                           |
| 22 | HS-B1 | 586055    | 4878237   | 96           | 195              | Low                   | Ca-HCO3    | 361           | 0.8              | -11.2                                 | -77.0                              | 0.0             | 28.44                    | 2000                        | -12.41                           |
| 23 | HS-B1 | 595461    | 4875000   | 89           | 160              | Medium                | Ca-HCO3    | 377           | 0.4              | -11.5                                 | -77.6                              | 0               | 47.35                    | 0                           | -11.16                           |
| 24 | HS-B1 | 591639    | 4878110   | 59           | 209              | High                  | Na-HCO3    | 679           | 2.4              | -12.7                                 | -86.1                              | 0               | 1.51                     | 24000                       | 0.48                             |
| 25 | HS-B1 | 589041    | 4877806   | 27           | 222              | None                  | Ca-HCO3    | 382           | 1.0              | -                                     | -                                  | -               | -                        | -                           | -                                |
| 26 | HS-B1 | 589041    | 4877806   | 27           | 222              | None                  | Ca-HCO3    | 394           | 0.9              | -                                     | -                                  | -               | -                        | -                           | -                                |
| 27 | HS-B1 | 589041    | 4877806   | 27           | 222              | None                  | Ca-HCO3    | 445           | 0.9              | -                                     | -                                  | -               | -                        | -                           | -                                |
| 28 | HS-B1 | 588746    | 4877838   | 25           | 223              | None                  | Na-HCO3    | 374           | 1.7              | -                                     | -                                  | -               | -                        | -                           | -                                |
| 29 | HS-B1 | 588746    | 4877838   | 25           | 223              | None                  | Na-HCO3    | 374           | 1.7              | -                                     | -                                  | -               | -                        | -                           | -                                |
| 30 | HS-B1 | 588746    | 4877838   | 25           | 223              | None                  | Na-HCO3    | 398           | 1.7              | -                                     | -                                  | -               | -                        | -                           | -                                |
| 31 | HS-B1 | 589245    | 4877667   | 32           | 214              | None                  | Na-HCO3    | 360           | 1.2              | -                                     | -                                  | -               | -                        | -                           | -                                |
| 32 | HS-B1 | 589245    | 4877667   | 32           | 214              | None                  | Na-HCO3    | 356           | 1.2              | -                                     | -                                  | -               | -                        | -                           | -                                |
| 33 | HS-B1 | 589245    | 4877667   | 32           | 214              | None                  | Na-HCO3    | 441           | 1.2              | -                                     | -                                  | -               | -                        | -                           | -                                |
| 34 | HS-B1 | 594870    | 4875765   | 78           | 164              | Low                   | Ca-HCO3    | 425           | 0.9              | -                                     | -                                  | -               | -                        | -                           | -                                |
| 35 | HS-B1 | 594867    | 4875770   | 88           | 168              | Low                   | Ca-HCO3    | 430           | 1.0              | -                                     | -                                  | -               | -                        | -                           | -                                |
| 36 | HS-B1 | 592173    | 4875469   | 49           | 211              | None                  | Ca-HCO3    | 433           | 0.5              | -                                     | -                                  | -               | -                        | -                           | -                                |
| 37 | HS-B1 | 592173    | 4875469   | 49           | 211              | None                  | Ca-HCO3    | 375           | 0.6              | -                                     | -                                  | -               | -                        | -                           | -                                |
| 38 | HS-B1 | 592173    | 4875469   | 49           | 211              | None                  | Ca-HCO3    | 422           | 0.6              | -                                     | -                                  | -               | -                        | -                           | -                                |

|    |       |        |         |     |     |        |         |     |      |       |       |      |       |        |        |
|----|-------|--------|---------|-----|-----|--------|---------|-----|------|-------|-------|------|-------|--------|--------|
| 39 | HS-B1 | 592173 | 4875469 | 49  | 211 | None   | Ca-HCO3 | 400 | 0.6  | -     | -     | -    | -     | -      | -      |
| 40 | HS-B1 | 592169 | 4875466 | 49  | 212 | None   | Ca-HCO3 | 376 | 0.6  | -     | -     | -    | -     | -      | -      |
| 41 | HS-B1 | 592169 | 4875466 | 49  | 212 | None   | Ca-HCO3 | 369 | 0.4  | -     | -     | -    | -     | -      | -      |
| 42 | HS-B1 | 592169 | 4875466 | 49  | 212 | None   | Ca-HCO3 | 407 | 0.3  | -     | -     | -    | -     | -      | -      |
| 43 | HS-B2 | 605023 | 4886668 | 115 | 134 | Low    | Na-HCO3 | 513 | 3.6  | -14.3 | -98.0 | 0    | -     | -      | -      |
| 44 | HS-B2 | 608500 | 4890700 | 31  | 239 | None   | Ca-HCO3 | 427 | 0.1  | -11.3 | -75.6 | -    | -     | -      | -10.65 |
| 45 | HS-B2 | 608500 | 4890700 | 104 | 166 | Low    | Na-HCO3 | 388 | 7.1  | -11.7 | -79.3 | 0.0  | 0     | >25000 | -3.2   |
| 46 | HS-B2 | 608500 | 4890700 | 31  | 239 | None   | Ca-HCO3 | 423 | 0.1  | -11.4 | -76.6 | 10.6 | 58.53 | 0      | -10.64 |
| 47 | HS-B3 | 611483 | 4901538 | 32  | 247 | None   | Ca-HCO3 | 626 | 0.3  | -11.6 | -80.7 | -    | 76.54 | 0      | -9.93  |
| 48 | HS-B3 | 611483 | 4901438 | 162 | 115 | Medium | Na-HCO3 | 293 | 5.1  | -12.1 | -82.6 | -    | 10.19 | 12000  | -11.49 |
| 49 | HS-B3 | 599723 | 4894672 | 143 | 155 | Medium | Na-HCO3 | 392 | 1.5  | -12.1 | -82.1 | 0    | 10.73 | -      | -7.86  |
| 50 | HS-B3 | 611483 | 4901438 | 47  | 232 | None   | Ca-HCO3 | 347 | 0.1  | -     | -     | -    | -     | -      | -      |
| 51 | HS-B3 | 610182 | 4900216 | 107 | 135 | Medium | Na-HCO3 | 272 | 4.8  | -     | -     | -    | -     | -      | -      |
| 52 | HS-B3 | 610182 | 4900216 | 107 | 135 | Medium | Na-HCO3 | 280 | 5.2  | -     | -     | -    | -     | -      | -      |
| 53 | HS-B3 | 602937 | 4892634 | 28  | 212 | None   | Ca-HCO3 | 449 | 0.1  | -     | -     | -    | -     | -      | -      |
| 54 | HS-B3 | 604750 | 4895458 | 37  | 216 | None   | Ca-HCO3 | 396 | 0.2  | -11.9 | -80.1 | 2.5  | -     | -      | -      |
| 55 | HS-B3 | 611391 | 4902061 | 30  | 241 | None   | Ca-HCO3 | 618 | 0.2  | -11.9 | -79.9 | 0    | -     | -      | -      |
| 56 | HS-B3 | 603224 | 4893398 | 38  | 191 | Low    | Na-HCO3 | 257 | 1.3  | -     | -     | -    | -     | -      | -      |
| 57 | HS-C  | 608619 | 4890715 | 104 | 166 | High   | Na-HCO3 | 270 | 10.2 | -     | -     | -    | -     | -      | -      |
| 58 | HS-C  | 604548 | 4890761 | 72  | 143 | Low    | Na-HCO3 | 365 | 6.7  | -13.3 | -91.4 | 0    | -     | -      | -      |
| 59 | HS-C  | 609100 | 4897700 | 105 | 119 | High   | Na-Cl   | 447 | 6.9  | -11.7 | -79.6 | 0    | -     | -      | -      |
| 60 | HS-C  | 604560 | 4890531 | 69  | 147 | Low    | Na-HCO3 | 419 | 4.8  | -13.2 | -90.8 | 0.0  | 0     | >25000 | -3.08  |
| 61 | HS-C  | 609121 | 4897653 | 102 | 195 | High   | Na-Cl   | 433 | 5.5  | -11.7 | -82.1 | 0.0  | 3.14  | 25000  | -11.43 |

\*The coordinates are in the NAD 83 / UTM Zone 17N reference system
